# Supplementary material for: The preponderance of nonsynonymous A-to-I RNA editing in coleoids is nonadaptive
Source: PubMed Central journal article supplement (PMC6881472; doi:10.1038/s41467-019-13275-2), 2019-11-27
Supplement: 41467_2019_13275_MOESM1_ESM.pdf [file 41467_2019_13275_MOESM1_ESM.pdf]

**Supplementary Materials for**

"The preponderance of nonsynonymous A-to-I RNA editing in coleoids is nonadaptive"

D. Jiang & J. Zhang (jianzhi@umich.edu)

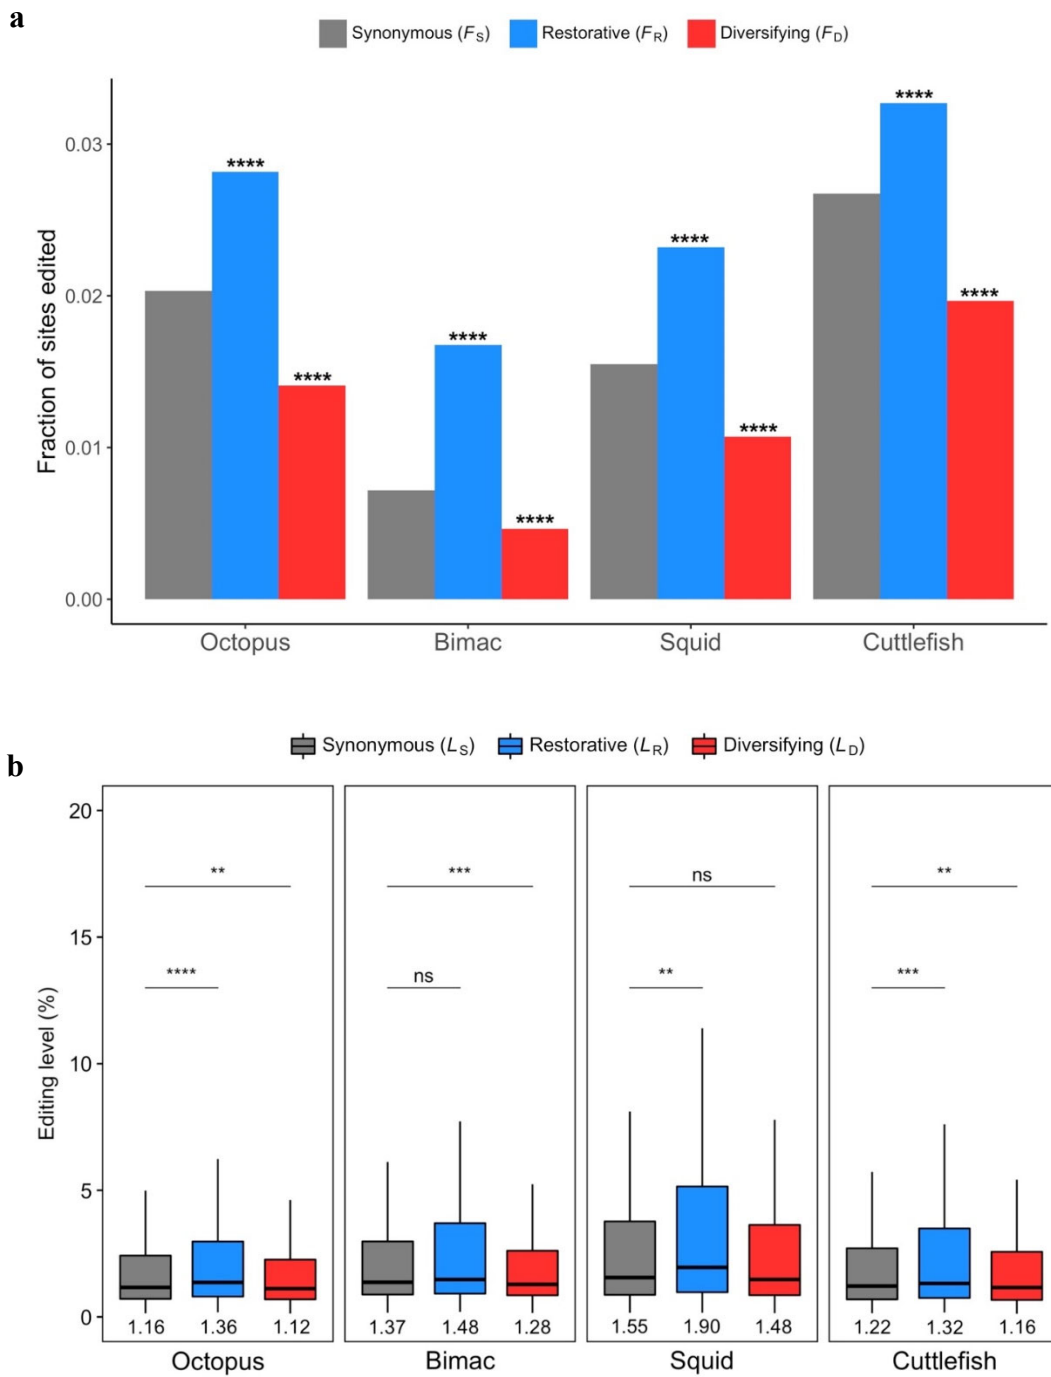

**Supplementary Fig. 1.** Respectively comparing restorative and diversifying editing with synonymous editing for species-specific editing supports the nonadaptive hypothesis of the preponderance of nonsynonymous editing in coleoids. **(a)** Frequencies of sites with synonymous ( $F_S$ ), restorative ( $F_R$ ), and diversifying ( $F_D$ ) editing, respectively, in each of the four coleoids, for species-specific editing. Significant difference between  $F_S$  and  $F_R$  (or  $F_D$ ) are indicated by stars above the bin of  $F_R$  (or  $F_D$ ) (\*,  $P < 0.05$ ; \*\*,  $P < 0.01$ ; \*\*\*,  $P < 0.001$ ; \*\*\*\*,  $P < 0.0001$ ; ns, not significant; chi-squared test). **(b)** Synonymous, restorative, and diversifying editing levels in

each of the four coleoids for species-specific editing. The lower and upper edges of a box represent the first ( $qu_1$ ) and third quartiles ( $qu_3$ ), respectively, the horizontal line inside the box indicates the median ( $md$ ), and the whiskers extend to the most extreme values inside inner fences,  $md \pm 1.5(qu_3 - qu_1)$ . The median editing levels are also given below the corresponding boxes. Significant differences between  $L_S$  and  $L_R$  (or  $L_D$ ) are indicated by stars (\*,  $P < 0.05$ ; \*\*,  $P < 0.01$ ; \*\*\*,  $P < 0.001$ ; \*\*\*\*,  $P < 0.0001$ ; ns, not significant; Mann-Whitney  $U$  test). Note that some identified species-specific editing may in fact be shared among species because of the low detectability of editing caused by low sequencing coverage and/or low editing level. While the group of identified species-specific editing may be contaminated with some shared editing, the group of identified shared editing is not contaminated with species-specific editing. Hence, true signals from species-specific editing can be inferred by comparing between the results here and those in Fig. 4. Specifically, the true signals from species-specific editing after the removal of the contamination from shared editing are inferred as follows. First, because shared editing between two species shows  $F_R < F_S$  (Fig. 4a), removal of contamination from shared editing would strengthen the signal of  $F_R > F_S$  observed in species-specific editing. In other words, the true signal of  $F_R > F_S$  should be even stronger than what is shown here. Second, the true signal of  $F_D < F_S$  should be similar to that seen here, because the relationship between  $F_D$  and  $F_S$  observed here is similar to that in Fig. 4a. Third, the true signal of  $L_R > L_S$  should be similar to that seen here, because the relationship between  $L_R$  and  $L_S$  observed here is similar to that in Fig. 4b. Fourth, because shared editing between two species shows  $L_D > L_S$  (Fig. 4b), removal of contamination from shared editing would strengthen the signal of  $L_D < L_S$  observed in species-specific editing. In other words, the true signal of  $L_D < L_S$  should be even stronger than what is shown here. Source data are provided as a Source Data file.

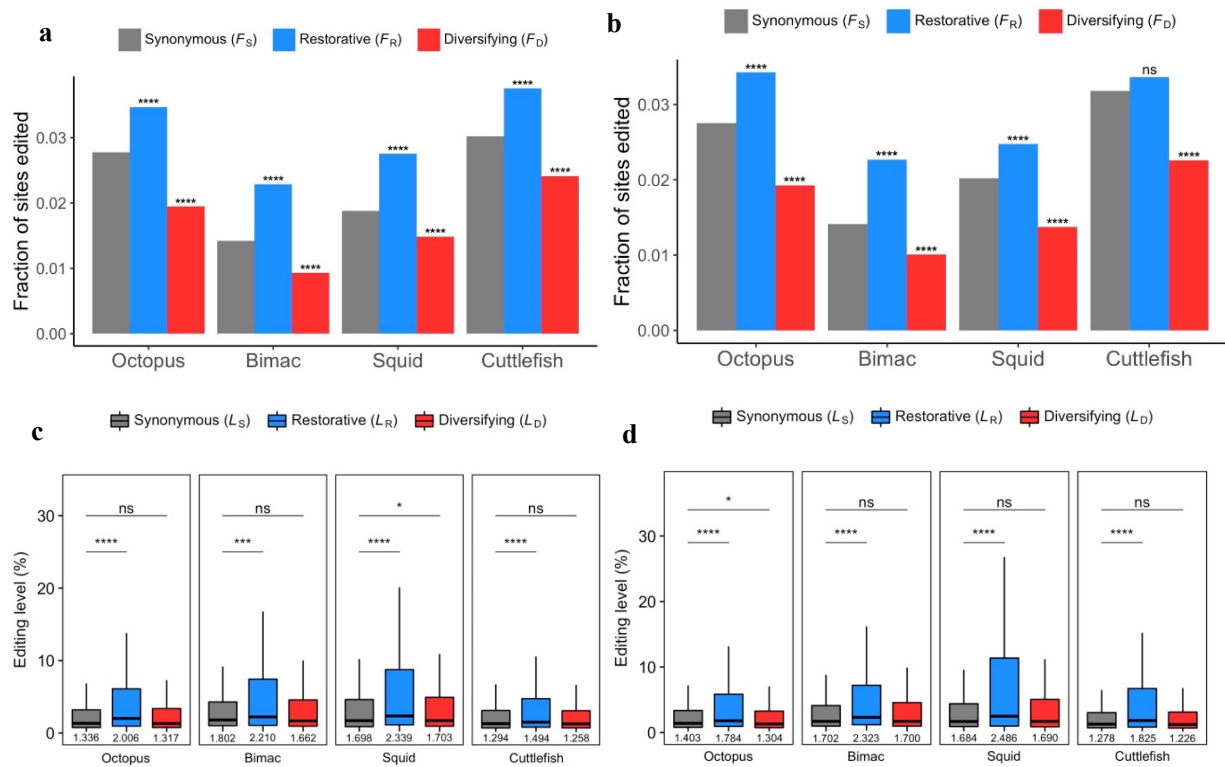

**Supplementary Fig. 2.** Comparison of editing levels between synonymous and nonsynonymous editing sites of different genes. Genes are ranked by  $dN/dS$  and are divided into two bins, with bin 1 comprising genes with odd ranks and bin 2 comprising genes with even ranks (see main text for details). **(a)** Comparison between editing frequencies of synonymous editing from bin 1 and those of nonsynonymous editing from bin 2. **(b)** Comparison between editing frequencies of synonymous editing from bin 2 and those of nonsynonymous editing from bin 1. **(c)** Comparison between editing levels of synonymous editing from bin 1 and those of nonsynonymous editing from bin 2. **(d)** Comparison between editing levels of synonymous editing from bin 2 and those of nonsynonymous editing from bin 1. All symbols have the same meanings as in Fig. 2. Source data are provided as a Source Data file.

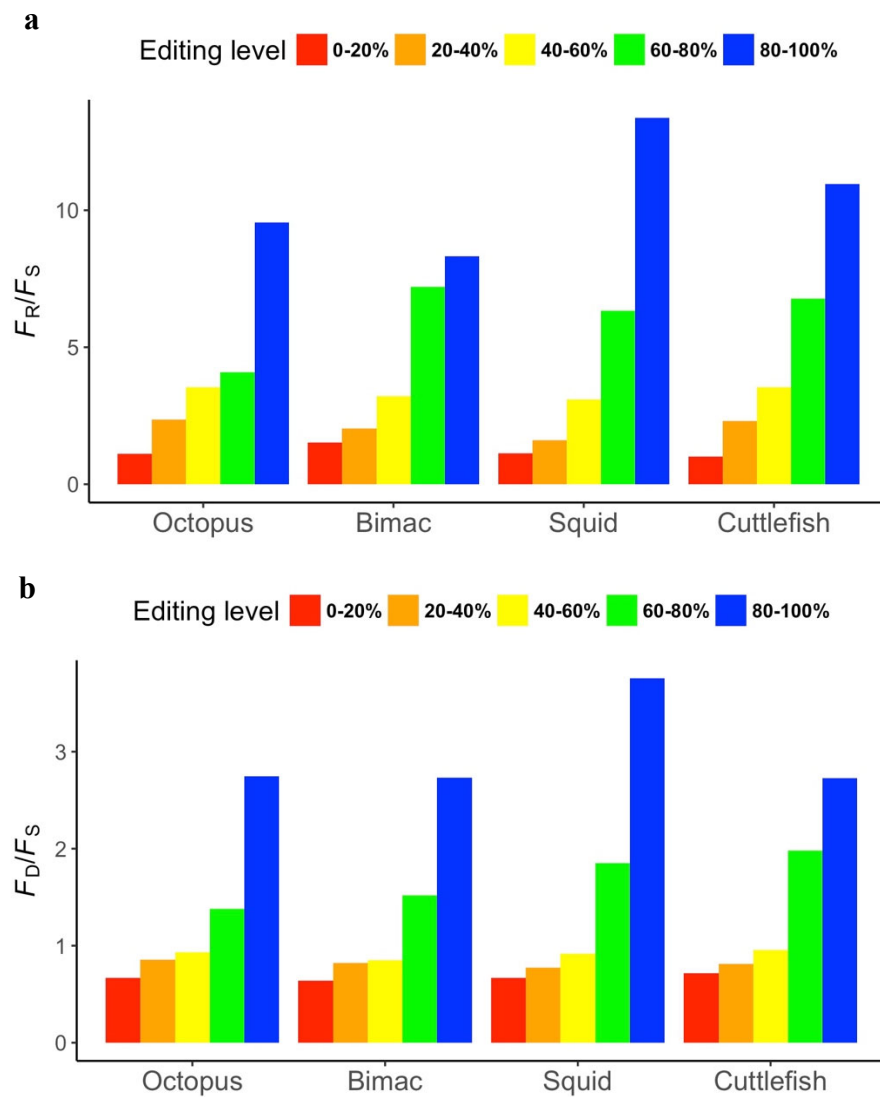

**Supplementary Fig. 3.** Ratios of editing frequencies of synonymous ( $F_S$ ), diversifying ( $F_D$ ), and radical ( $F_R$ ) editing in various ranges of editing levels. **(a)**  $F_R/F_S$ . **(b)**  $F_D/F_S$ . Note the different Y-axis scales of the two panels. Source data are provided as a Source Data file.

Supplementary Table 1. Numbers of editing sites of each category. In the parentheses are numbers of species-specific editing.

|                                     | Synonymous      | Nonsynonymous |                 |
|-------------------------------------|-----------------|---------------|-----------------|
|                                     |                 | Restorative   | Diversifying    |
| Octopus                             | 19,014 (14,039) | 2,818 (2,309) | 30,760 (22,422) |
| Bimac                               | 10,142 (5,167)  | 1,960 (1,451) | 16,013 (7,675)  |
| Squid                               | 13,053 (10,414) | 1,838 (1,641) | 21,780 (16,412) |
| Cuttlefish                          | 19,939 (17,300) | 2,513 (2,316) | 34,906 (29,538) |
| Shared between octopus and bimac    | 4,975           | 509           | 8,338           |
| Shared between squid and cuttlefish | 2,639           | 197           | 5,368           |
| Shared among all four coleoids      | 134             | 11            | 376             |

Supplementary Table 2. Patterns of restorative and diversifying editing in 12 different tissues of the bimac. Stars indicate significant differences from synonymous editing (\*,  $P < 0.05$ ; \*\*,  $P < 0.01$ ; \*\*\*,  $P < 0.001$ ; \*\*\*\*,  $P < 0.0001$ ; chi-squared test and Mann-Whitney  $U$  test are used for comparisons of editing frequencies and editing levels, respectively; #, not significant after the Bonferroni correction for multiple testing). As in the main analysis, editing levels are compared for sites covered by at least 400 RNA-seq reads. No restorative editing site satisfying this condition is found in two tissues; their  $L_R$  values are shown as “NA”.

| Tissue                               | Editing frequencies     |                          |                           | Median editing levels (%) |                          |                           |
|--------------------------------------|-------------------------|--------------------------|---------------------------|---------------------------|--------------------------|---------------------------|
|                                      | Synonymous<br>( $F_S$ ) | Restorative<br>( $F_R$ ) | Diversifying<br>( $F_D$ ) | Synonymous<br>( $L_S$ )   | Restorative<br>( $L_R$ ) | Diversifying<br>( $L_D$ ) |
| Axial nerve cord<br>(ANC)            | 0.0039                  | 0.0072****               | 0.0027****                | 1.35                      | 1.88                     | 1.92                      |
| Optical lobe<br>(OL)                 | 0.0032                  | 0.0062****               | 0.0023****                | 1.95                      | 8.10                     | 1.43                      |
| Subesophageal<br>brain (sub)         | 0.0055                  | 0.0095****               | 0.0038****                | 2.32                      | 3.56****                 | 2.60*#                    |
| Supraesophageal<br>brain (supra)     | 0.0053                  | 0.0093****               | 0.0036****                | 1.40                      | 2.15****                 | 1.53**#                   |
| Posterior<br>salivary gland<br>(PSG) | 0.00021                 | 0.00060****              | 0.00017                   | 0.92                      | NA                       | 0.16                      |
| Skin                                 | 0.00034                 | 0.00076****              | 0.00023****               | 0.24                      | 0.49                     | 0.23                      |
| Sucker                               | 0.00066                 | 0.0015****               | 0.00051****               | 0.44                      | 0.39                     | 0.31                      |
| Retina                               | 0.00071                 | 0.0018****               | 0.00051****               | 0.48                      | 0.37                     | 0.55                      |
| Ovary                                | 0.00013                 | 0.00029*#                | 0.000084*#                | 0.39                      | NA                       | 0.23                      |
| Testes                               | 0.00031                 | 0.00066****              | 0.00022***                | 0.21                      | 0.22                     | 0.17                      |
| Viscera                              | 0.00027                 | 0.00060****              | 0.00018***                | 0.19                      | 0.56                     | 0.20                      |
| Stage 15 embryo<br>(ST15)            | 0.0010                  | 0.0023****               | 0.00074****               | 0.56                      | 0.53                     | 0.44                      |

Supplementary Table 3. Proportion of editing sites belonging to each editing level range.

| Species    | Type         | 0-20%  | 20-40% | 40-60% | 60-80% | 80-100% |
|------------|--------------|--------|--------|--------|--------|---------|
| Octopus    | Synonymous   | 95.62% | 2.82%  | 0.95%  | 0.51%  | 0.11%   |
|            | Restorative  | 89.78% | 5.62%  | 2.84%  | 1.75%  | 0.88%   |
|            | Diversifying | 93.7%  | 3.53%  | 1.29%  | 1.03%  | 0.44%   |
| Bimac      | Synonymous   | 94.02% | 3.74%  | 1.58%  | 0.54%  | 0.13%   |
|            | Restorative  | 89.62% | 4.77%  | 3.18%  | 2.43%  | 0.65%   |
|            | Diversifying | 91.52% | 4.69%  | 2.04%  | 1.24%  | 0.52%   |
| Squid      | Synonymous   | 93.26% | 3.98%  | 1.55%  | 0.78%  | 0.42%   |
|            | Restorative  | 86.69% | 5.28%  | 3.96%  | 4.08%  | 4.56%   |
|            | Diversifying | 89.20% | 4.43%  | 2.04%  | 2.08%  | 2.24%   |
| Cuttlefish | Synonymous   | 95.71% | 2.73%  | 1.01%  | 0.44%  | 0.11%   |
|            | Restorative  | 88.24% | 5.76%  | 3.29%  | 2.71%  | 1.06%   |
|            | Diversifying | 94.05% | 3.04%  | 1.33%  | 1.18%  | 0.39%   |



Supplementary Table 4. Numbers of sites that are respectively edited, unedited, and substituted in the fourth coleoid among those sites that are edited in the other three coleoids examined.

|                       | Edited A | Unedited A | A-to-G substitution | A-to-C or A-to-T substitution |
|-----------------------|----------|------------|---------------------|-------------------------------|
| Synonymous editing    | 134      | 0          | 1                   | 0                             |
| Nonsynonymous editing | 409      | 0          | 20                  | 0                             |
| Diversifying editing  | 382      | 0          | 20                  | 0                             |
